# Supplementary material for: Loss of chloroplast protease SPPA function alters high light acclimation processes in Arabidopsis thaliana L. (Heynh.)
Source: PubMed Central journal article supplement — J Exp Bot. 2009 Apr 6;60(6):1715–27. doi: 10.1093/jxb/erp051 (PMC2671626; doi:10.1093/jxb/erp051), 2009-04-06
Supplement: erp051_1.pdf [file erp051_1.pdf]

**Loss of chloroplast protease SPPA function alters high light acclimation processes in *Arabidopsis thaliana* L. (Heynh.)**

Carolyn M. Wetzel, Laura D. Harmacek, Lee H. Yuan, Judith L.M. Wopereis, Rhiannon Chubb, and Paula Turini

**SUPPLEMENTARY DATA**

**Table S1.** Primer sequences and PCR conditions for RT-PCR assays. Total RNA was primed with oligo dT (20-mer) for cDNA synthesis. Touchdown PCR cycles: 94 °C 3 min, 3 reps of (94 °C 1 min, 60 °C 0.5 min, 72 °C 1 min), 35 reps of (94 °C 1 min, \* °C 0.5 min, 72 °C 1 min), 72 °C 10 min. Primer sets and \*annealing temperatures are shown in the table.

| Primer Set | Forward Primer<br>5'» 3'  | Reverse Primer<br>5'» 3' | Annealing Temperature (°C) |
|------------|---------------------------|--------------------------|----------------------------|
| A          | tccgcagcggcctttatacagaaga | cgagaaagctgatctccagcactt | 54                         |
| B          | ttgtctttctcgactccaage     | tatcttggatgtgcatgcaac    | 50                         |
| C          | agagaaacaggaacagctgctgga  | tggacccttaacccgagaaatgct | 55                         |
